# Supplementary material for: Mitochondrial Mistranslation in Brain Provokes a Metabolic Response Which Mitigates the Age-Associated Decline in Mitochondrial Gene Expression
Source: MDPI journal article supplement (doi:10.3390/ijms22052746), 2021-03-09
Supplement: s1 [file s1]

| Pathway/GO term/Process Network                                | p-value corrected |
|----------------------------------------------------------------|-------------------|
| <b>Downregulated terms</b>                                     |                   |
| <b>Mitochondria-related</b>                                    |                   |
| Oxidative phosphorylation (KEGG)                               | 8.61E-25          |
| Electron Transport Chain WP295 (Wiki)                          | 2.13E-19          |
| Thermogenesis (KEGG)                                           | 1.51E-17          |
| Mitochondrial respiratory chain complex assembly (GO)          | 6.18E-08          |
| Citrate cycle (KEGG)                                           | 4.45E-07          |
| Glycolysis and Gluconeogenesis WP157 (Wiki)                    | 2.21E-04          |
| Pyruvate metabolism (KEGG)                                     | 3.90E-03          |
| <b>Translation</b>                                             |                   |
| Translation Factors WP307 (Wiki)                               | 1.14E-02          |
| <b>RNA metabolism</b>                                          |                   |
| RNA transport (KEGG)                                           | 2.24E-06          |
| Transcription. Transcription by RNA polymerase II (PN)         | 2.19E-03          |
| mRNA processing WP310 (Wiki)                                   | 9.81E-02          |
| <b>Proteasome-related</b>                                      |                   |
| Proteasome (KEGG)                                              | 1.45E-14          |
| Ubiquitin mediated proteolysis (KEGG)                          | 1.67E-08          |
| Protein polyubiquitination (GO)                                | 4.77E-05          |
| <b>Synapse-related</b>                                         |                   |
| Synaptic vesicle cycle (KEGG)                                  | 9.40E-06          |
| Dopaminergic synapse (KEGG)                                    | 1.56E-04          |
| Neurophysiological process. Transmission of nerve impulse (PN) | 2.91E-04          |
| Development. Neurogenesis. Synaptogenesis (PN)                 | 6.04E-04          |
| Cholinergic synapse (KEGG)                                     | 3.37E-02          |
| GABAergic synapse (KEGG)                                       | 4.69E-02          |
| <b>Upregulated terms</b>                                       |                   |
| <b>Extracellular matrix reorganization/tissue remodeling</b>   |                   |
| Extracellular matrix organization (GO)                         | 8.06E-33          |
| Cell adhesion. Cell-matrix interactions (PN)                   | 3.60E-25          |
| Focal Adhesion WP85 (Wiki)                                     | 4.96E-17          |
| ECM-receptor interaction (KEGG)                                | 1.62E-16          |
| Cell adhesion molecules (KEGG)                                 | 4.40E-12          |
| <b>Inflammation</b>                                            |                   |
| Neutrophil mediated immunity (GO)                              | 5.42E-13          |
| Inflammatory Response Pathway WP458 (Wiki)                     | 3.80E-06          |
| Complement and coagulation cascades (KEGG)                     | 7.14E-06          |

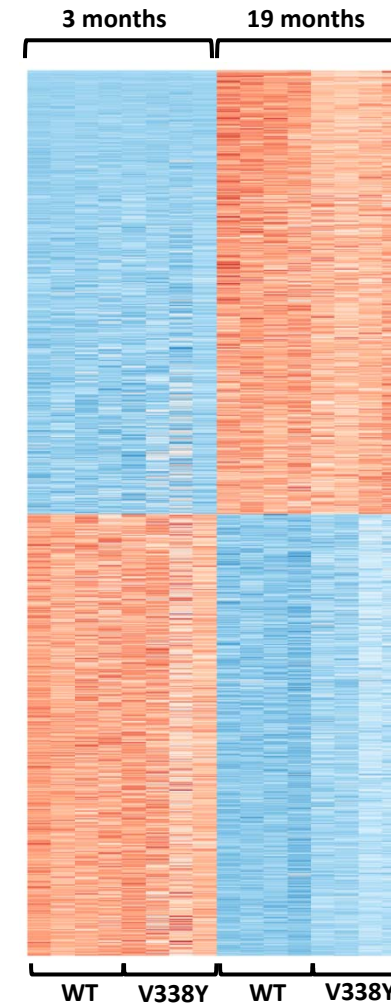

**Figure S1.** Brain RNAseq analysis of *Mrps5*<sup>WT/WT</sup> and *Mrps5*<sup>V338Y/V338Y</sup> mice of 3 months and 19 months age. (Left): Terms and significance for regulated transcripts (19 months vs 3 months), adjusted p-values are shown. (Right) Heatmap of genes, significantly regulated during aging ( $p < 1 \times 10^{-5}$ ).

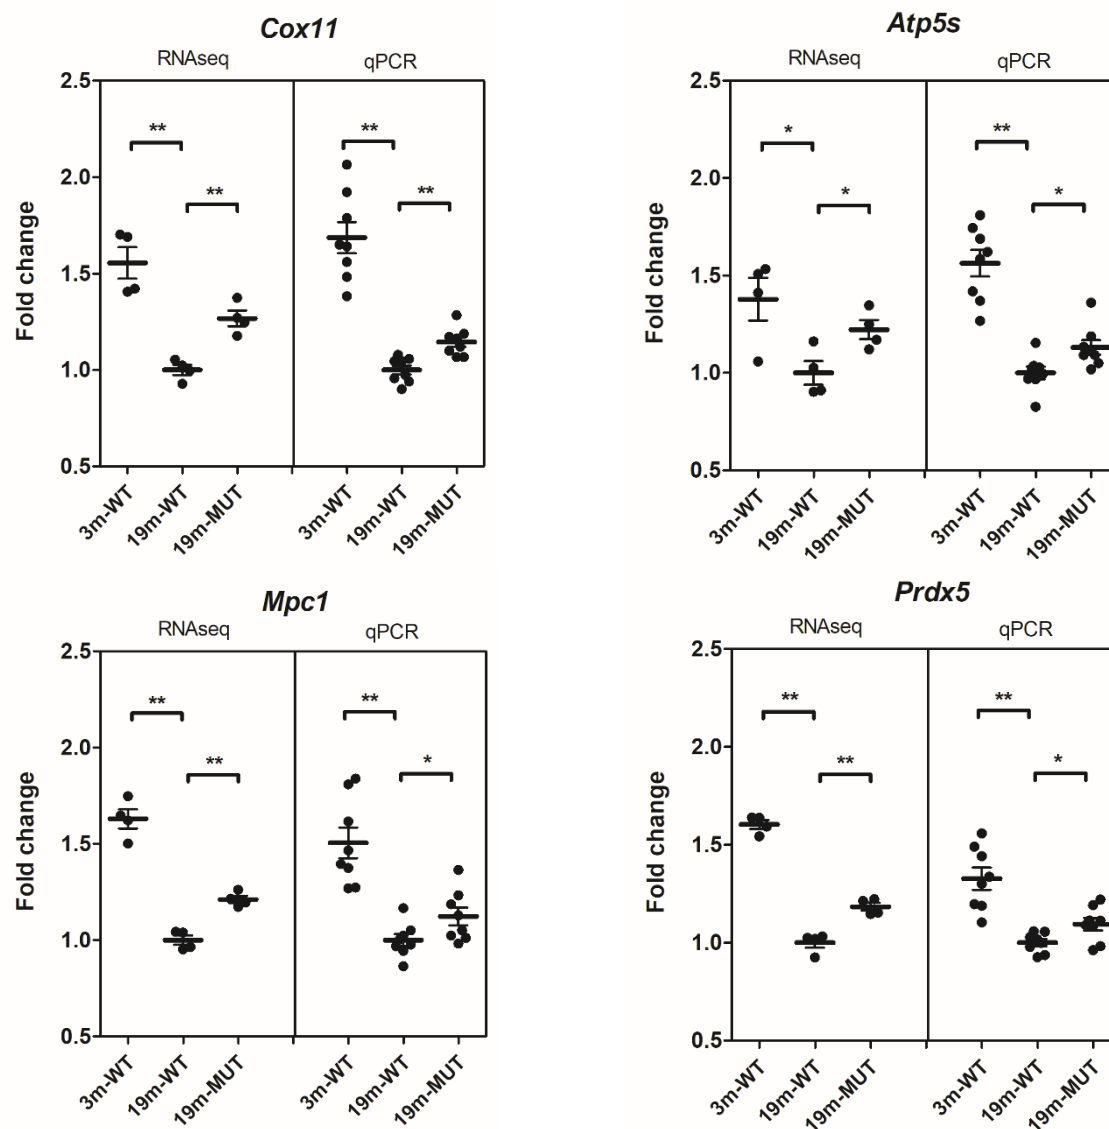

**Figure S2.** RT-qPCR for selected genes in brain of  $Mrps5^{V338Y/V338Y}$  and  $Mrps5^{WT/WT}$  mice of 19 months age; 3 months  $Mrps5^{WT/WT}$  and RNAseq data are shown for comparison. \*-  $p < 0.05$ , \*\* -  $p < 0.001$ . For RNAseq biological samples (n=4) are shown. For qPCR technical duplicates for biological samples (n=4) are shown. Error bars represent SEM.
